# Supplementary material
Source: publisher figshare collection journal article supplement (https://acs.figshare.com/ndownloader/files/4970152)
Supplement: Supplementary file 1 [file 4970152]

Supporting Information to

# Synthesis of Poly(2-aminothiazole) for Selective Removal of Hg(II) in Aqueous Solutions

Xia Wang,<sup>†</sup> Pengfei Lv,<sup>†</sup> Hua Zou,<sup>†,\*</sup> Ying Li,<sup>†</sup> Xiaoyan Li,<sup>†</sup> Yaozu Liao<sup>‡,\*</sup>

<sup>†</sup>School of Materials Science and Engineering, University of Shanghai for Science and Technology, 516 Jungong Road, Shanghai 200093, China

E-mail: hua.zou@usst.edu.cn. Phone: +86-21-55270632. Fax: +86-21-55270632.

<sup>‡</sup>State Key Laboratory for Modification of Chemical Fibers and Polymer Materials & College of Materials Science and Engineering, Donghua University, Shanghai 201620, China

E-mail: yzliao@dhu.edu.cn. Phone: +86-21-67792882. Fax: +86-21-67792855.

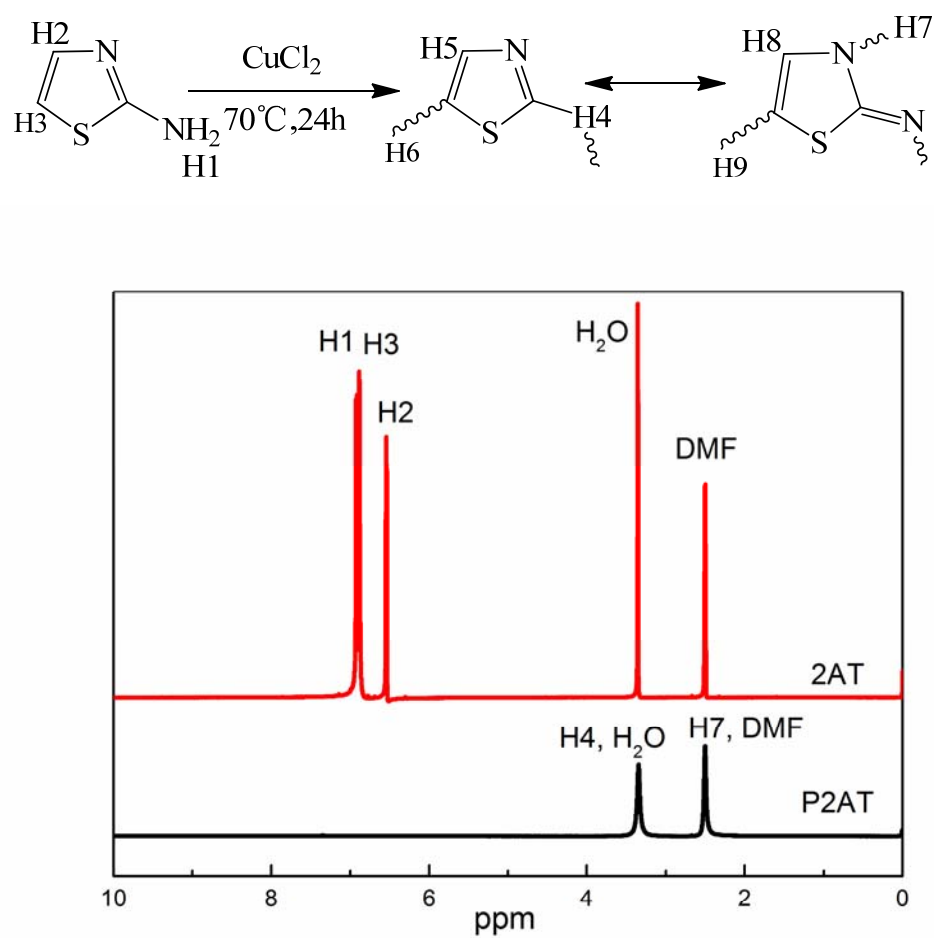

**Figure S1.** Synthetic route to PAT with two tautomeric forms and  $^1\text{H}$  NMR spectra of AT and PAT.
